# Supplementary material
Source: PubMed Central journal article supplement (PMC5350793)

# Supplemental Figure 1

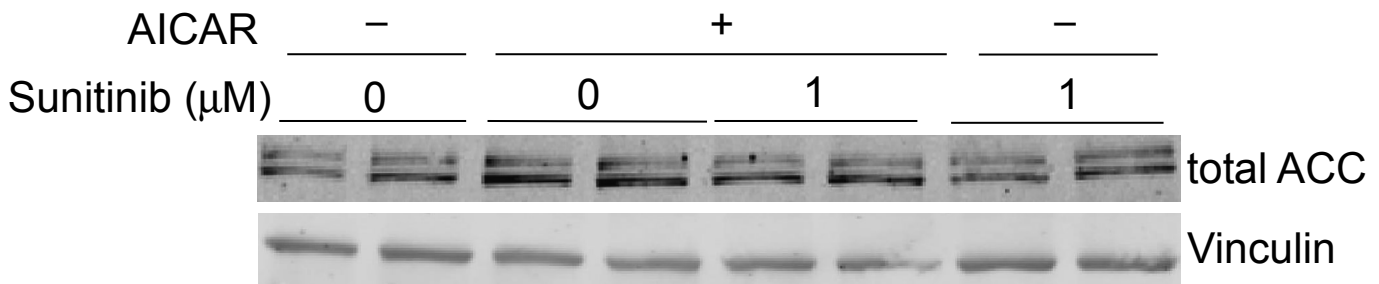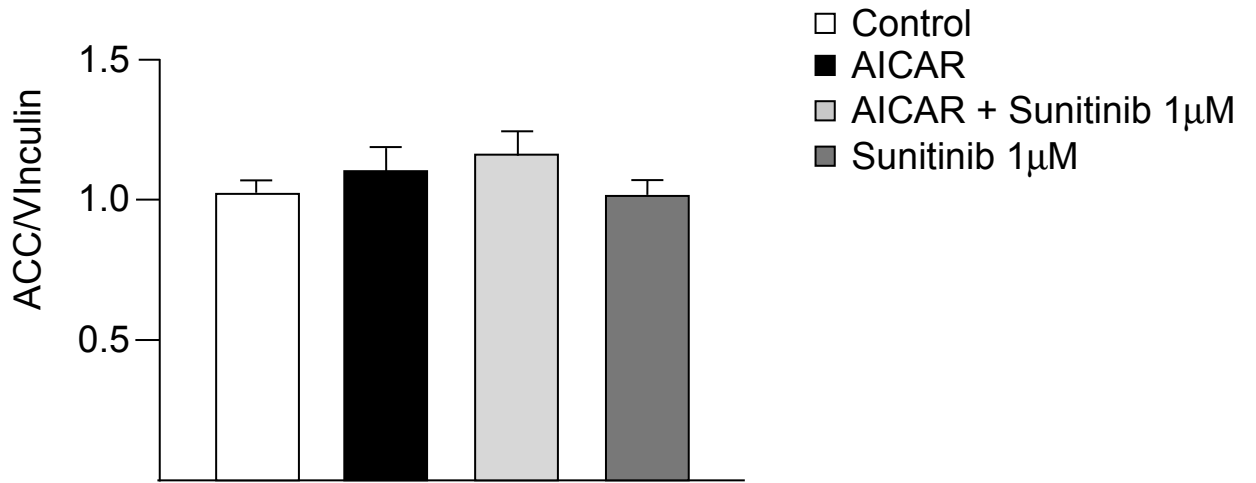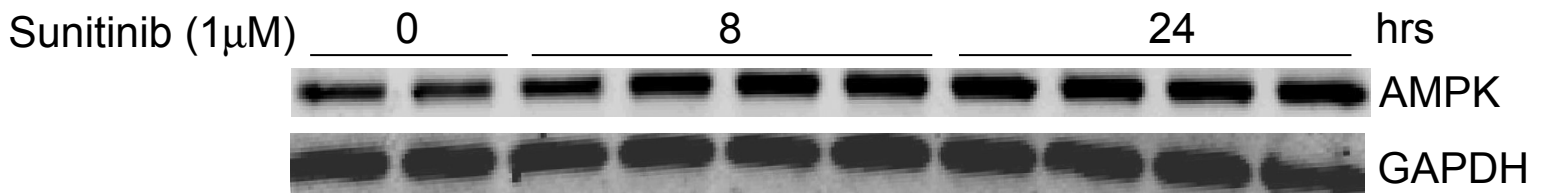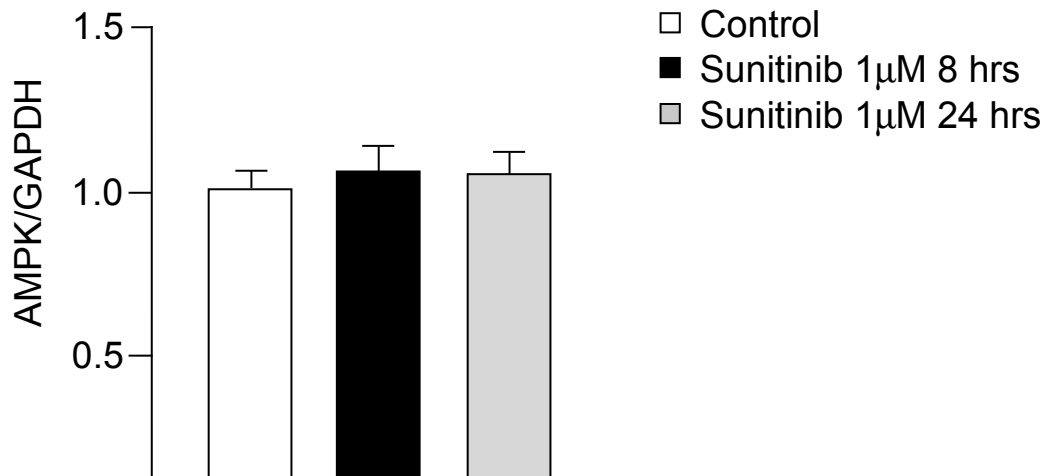

## Supplemental Figure 2

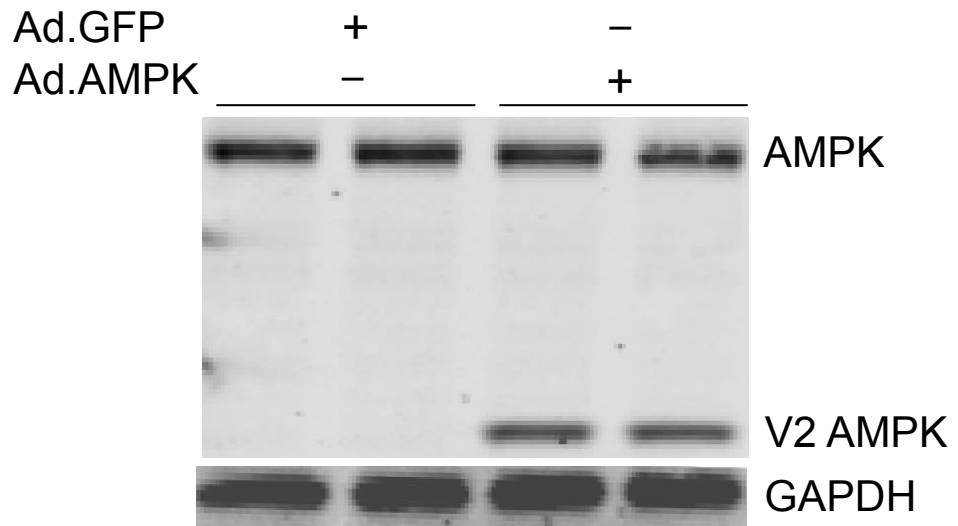

Supplement: CTS-2-15_001.pdf [file CTS-2-15_001.pdf]
